# Supplementary material
Source: publisher figshare collection journal article supplement (https://sage.figshare.com/ndownloader/files/39374378)

## Supplemental File

Code Counts for full sample and dyads

Met Need Frequency Chart for Full Sample, N = 30 (n = 18 CGs; n = 12 PWDs)

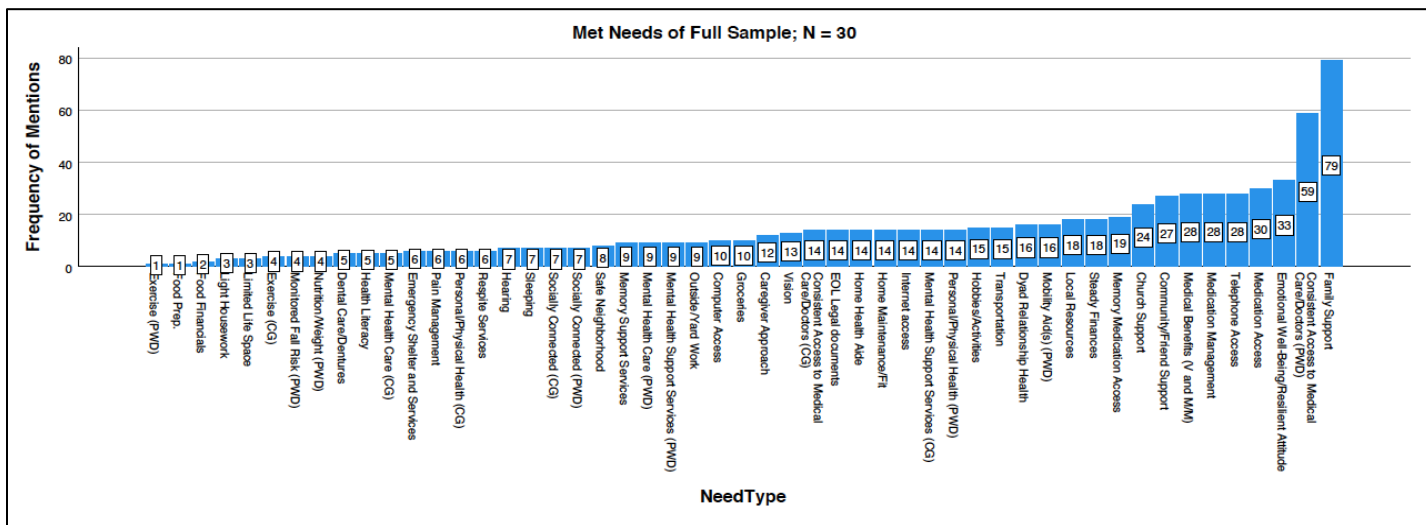

Unmet Need Frequency Chart for Full Sample, N = 30 (n = 18 CGs; n = 12 PWDs)

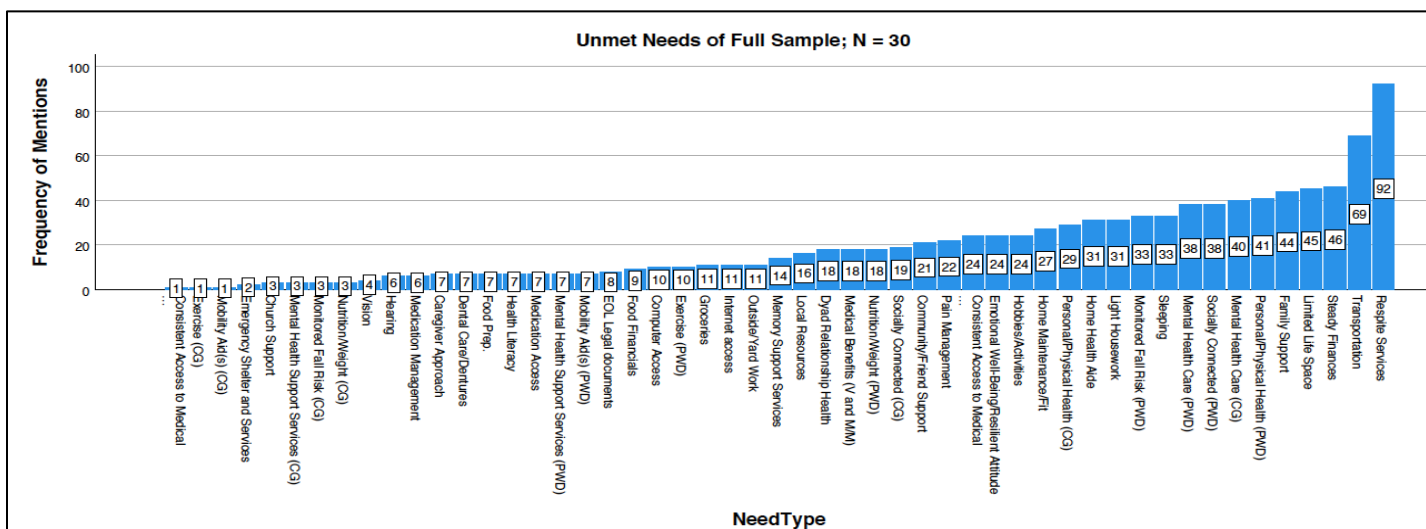

Met Need Frequency Chart for All Dyads in Sample, 10 dyads (10 CGs, 10 PWDs, total of n = 20)

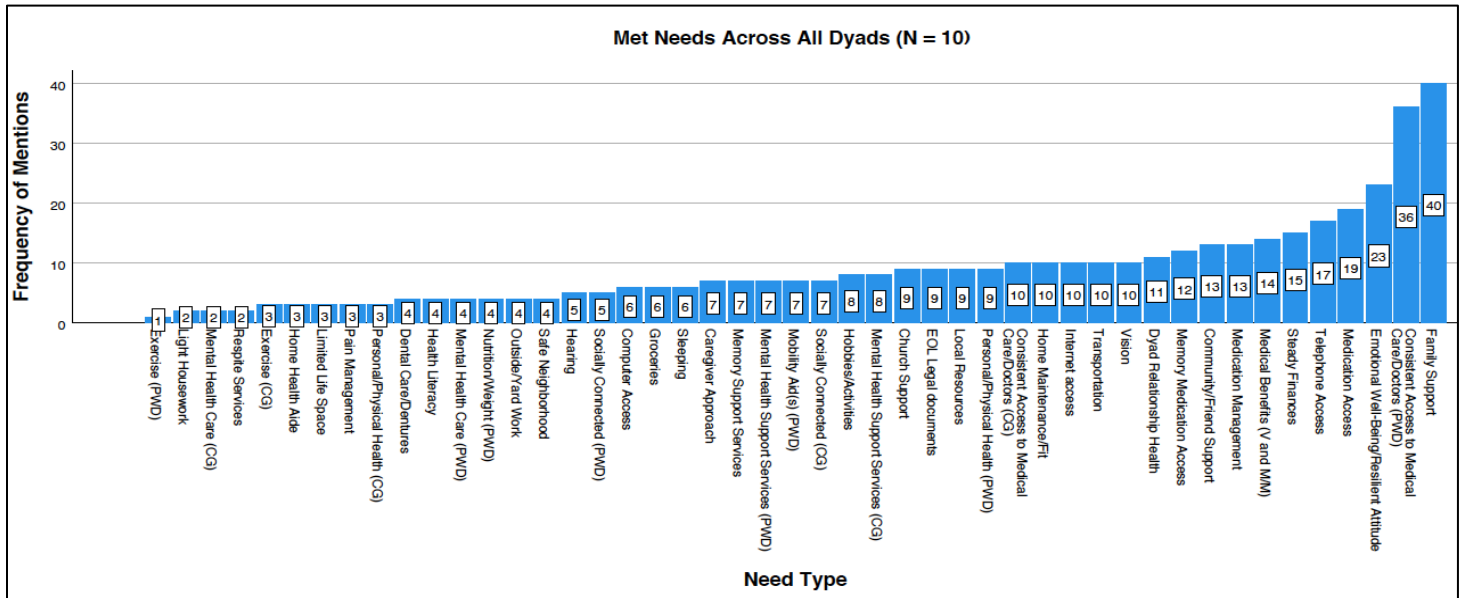

Unmet Need Frequency Chart for All Dyads in Sample, 10 dyads (10 CGs, 10 PWDs, total of n = 20)

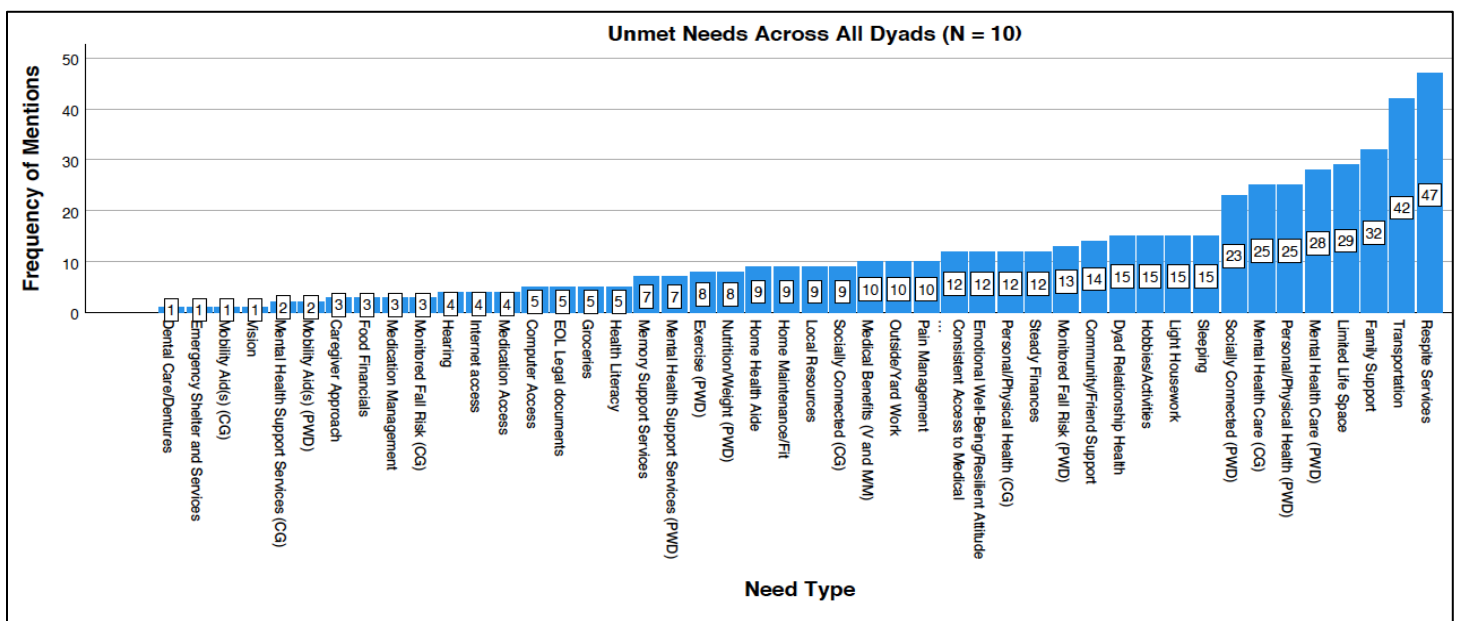

Supplement: Supplementary file 1 [file 39374378]
